# Supplementary material
Source: publisher figshare collection journal article supplement (https://aacr.figshare.com/ndownloader/files/39843743)
Supplement: Supplementary file 1 [file 39843743]

### **Supplementary Figure legends**

**Supplementary Figure 1. Real-time analysis of miR-205 expression in normal lung epithelial cells (NLEs), immortalized human bronchial epithelial cell line (BEAS-2B) and several NSCLC cell lines.** Transcript levels were normalized by *U6* expression. Error bars represent the means  $\pm$  SD derived from three independent experiments. \*:  $P<0.05$ .

**Supplementary Figure 2. (A and B) Real-time analysis of miR-205 expression in H460 and H596 cells transduced with control vector or miR-205 (A), or transfected with anti-miR-186 (Anti-miR) or NC oligonucleotides (B).** Transcript levels were normalized by *U6* expression. Error bars represent the means  $\pm$  SD derived from three independent experiments. \*\*:  $P<0.01$ .
